# Supplementary material
Source: publisher figshare collection journal article supplement (https://sage.figshare.com/ndownloader/files/17810963)
Supplement: Supplementary file 1 [file 17810963]

**Supplementary material**

**Appendix Figure 1. Preference values of individual participants from best-minus-worst scaling survey data**
